# Supplementary material for: A systematic review and meta-analysis of 24-h urinary output of children and adolescents: impact on the assessment of iodine status using urinary biomarkers
Source: PubMed Central journal article supplement (PMC7501103; doi:10.1007/s00394-019-02151-w), 2019-11-29
Supplement: 394_2019_2151_MOESM1_ESM.pdf [file 394_2019_2151_MOESM1_ESM.pdf]

## **NEWCASTLE-OTTAWA SCALE FOR ASSESSING THE QUALITY OF INCLUDED STUDIES**

### **A STUDY CAN SCORE A MAXIMUM OF 10 STARS**

#### **Selection (maximum 2 stars)**

- 1) Representativeness of the study sample (maximum 2 stars)
  - a. truly representative of the source population ★★
  - b. somewhat representative of the source population ★
  - c. selected group of users eg. small age range, single gender, small sample size
  - d. no description of the derivation of the cohort

#### **Comparability (maximum 1 star)**

- 1) Normalisation of urine collection time
  - a. collection normalized to 24-hour period ★
  - b. some other normalization applied to results ★
  - c. results not normalized
  - d. unclear as to whether results were normalized

#### **Assessment of Outcome: 24-hour urine collection (maximum 7 stars)**

- 1) Instructions given to participants (maximum 2 stars)
  - a. clear instructions given to both the parents and the child participant ★★
  - b. instructions only given to either the parent or the participant★
  - c. unclear as to the level of instruction given
- 2) Start/stop time of urine collection (maximum 1 star)
  - a. parent or researcher recorded the start and stop time ★
  - b. child reported start and stop time
  - c. no information provided
- 3) Sample inclusion/exclusion criteria (maximum 4 stars)
  - a. time of collection ★
  - b. volume of collection ★
  - c. number of missed samples/spillages ★
  - d. creatinine cutoff ★
  - e. no description of urine exclusion/inclusion criteria
